# Supplementary material for: Expression of a Hydroxycinnamoyl-CoA Shikimate/Quinate Hydroxycinnamoyl Transferase 4 Gene from Zoysia japonica (ZjHCT4) Causes Excessive Elongation and Lignin Composition Changes in Agrostis stolonifera
Source: MDPI journal article supplement (doi:10.3390/ijms23169500), 2022-08-22
Supplement: s1 [file s1]

**Expression of a Hydroxycinnamoyl-CoA  
Shikimate/Quinate Hydroxycinnamoyl  
Transferase 4 Gene from *Zoysia japonica*  
(*ZjHCT4*) Causes Excessive Elongation and Lignin  
Composition Changes in *Agrostis stolonifera***

Di Dong <sup>1,†</sup>, Zhuoxiong Yang <sup>1,†</sup>, Yuan Ma <sup>1</sup>, Shuwen Li <sup>1</sup>, Mengdi Wang <sup>1</sup>, Yinruizhi Li <sup>1</sup>,  
Zhuocheng Liu <sup>1</sup>, Chenyan Jia <sup>2\*</sup>, Liebao Han <sup>1,\*</sup> and Yuehui Chao <sup>1,\*</sup>

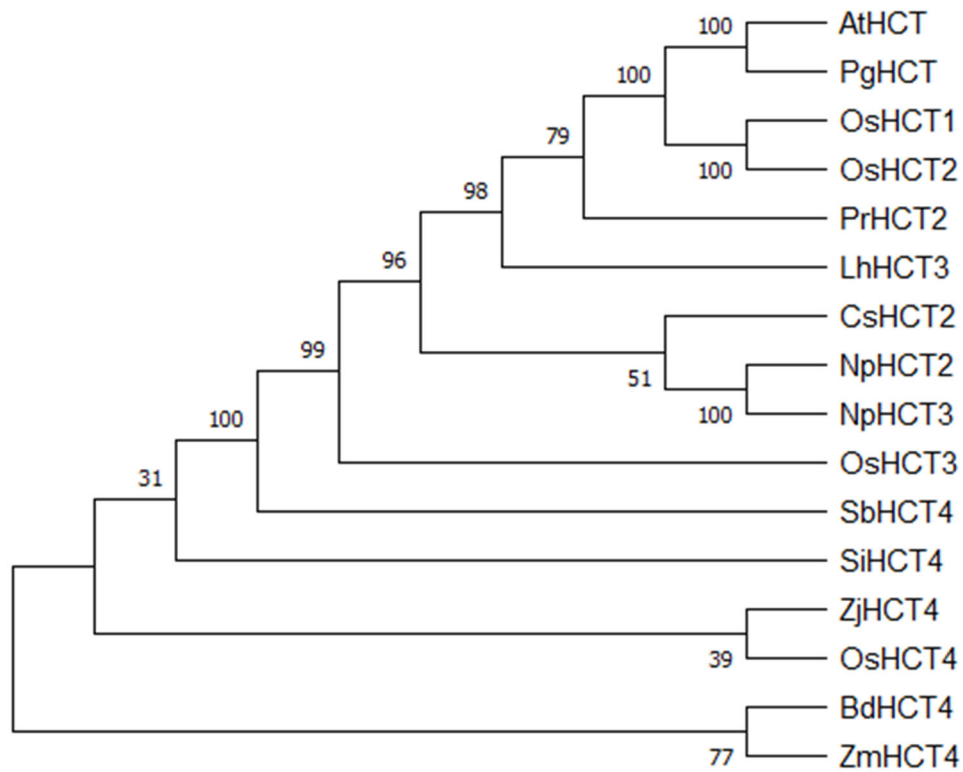

**Supplementary Figure S1.** Analysis of HCTs proteins. Protein sequence accession numbers are as follows: AT5G48930.1, AtHCT, *Arabidopsis thaliana*; AZS54120.1, PgHCT, *Punica granatum*; Q0JBZ8.1, OSHCT1, *Oryza sativa*; Q6K638.1, OsHCT2, *Oryza sativa*; ASM47232.1, PrHCT2, *Parasponia rugosa*; AKN80440.1, LhHCT3, *Lonicera hypoglauc*; KAF4871374.1, CsHCT2, *Colletotrichum siamense*; AXU39903.1, NpHCT2, *Narcissus papyraceus*; AXU39904.1, NpHCT3, *Narcissus papyraceus*; Q5SMM8.1, OsHCT3, *Oryza sativa*; XP\_002462397.1, SbHCT4, *Sorghum bicolor*; XP\_004964652.1, SiHCT4, *Setaria italica*; Q5SMM6.1, OsHCT4, *Oryza sativa*; XP\_010229918.1, BdHCT4, *Brachypodium distachyon*; PWZ06330.1 ZmHCT4, *Zea mays*.

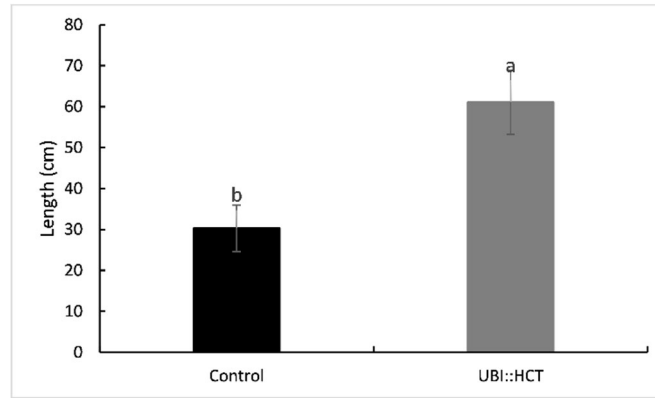

**Supplementary Figure S2.** Length comparison of transgenic plants and control plants after 30 days of growth. Statistical significance of differences was assessed using the Student's t-test. Different letters above the columns indicate significant differences ( $p < 0.05$ ,  $n = 10$ ).

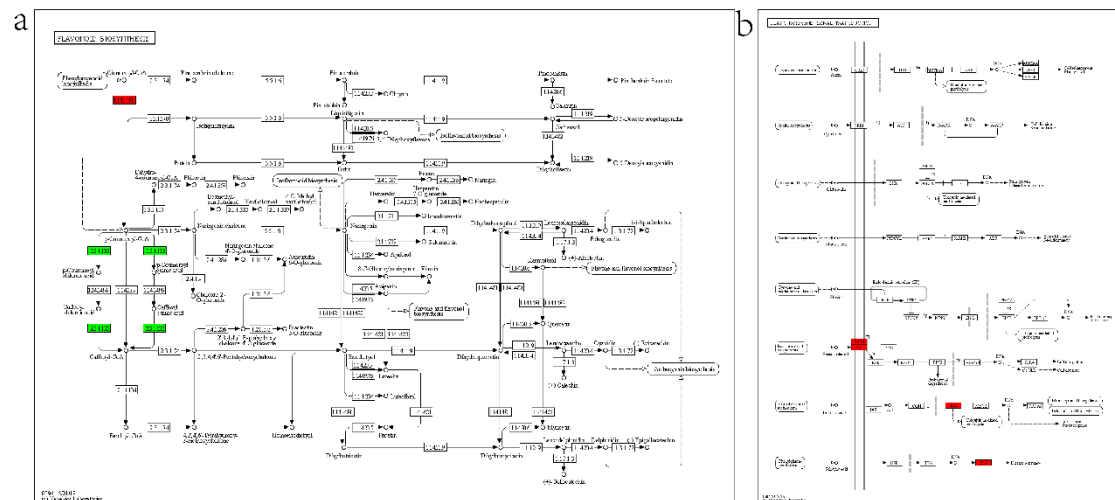

**Supplementary Figure S3.** KEGG pathways for DEGs in transgenic and control leaves. (a) DEGs mapped to flavonoid biosynthesis. EC:2.3.1.133, HCT; EC:1.14.14.91, trans-cinnamate 4-monooxygenase. (b) DEGs involved in plant hormone signal transduction

**Supplementary Table S1.** Protein sequence of HCT proteins.

| Protein sequence                                                                                                                                                                                                                                                                                                                                                                                                                                                                                                                               |
|------------------------------------------------------------------------------------------------------------------------------------------------------------------------------------------------------------------------------------------------------------------------------------------------------------------------------------------------------------------------------------------------------------------------------------------------------------------------------------------------------------------------------------------------|
| <p>&gt;ZjHCT4</p> <p>MATVVTSVVATAGAVWSNDAARRGYTTVYYRNGAADA VKDSSKAVAYAGRGVDTGRVVDCTGG<br/> AVVTARSDYVDDNVC MRDVATANCAVVTYRCGGVVGAMHHSVVDARGAAHTWASISRGDTAHA<br/> AVCDHSAARTTVYDHRYKVDVTASTYASAIITMTKGVSAKARCAGASTRSVVAVWCVCRAAATRY<br/> SMIDMRTRDAGYGNVIRTSVSATVGVVANVGYAARRAAATTGDYTRSDYGV DAMNRS GISRAH<br/> RAISWVGMSYKADGWGAAMGAIMYYSGVYVMNAAGKDGD AVSSMRKVADASVA</p>                                                                                                                                                                      |
| <p>&gt;SiHCT4</p> <p>MAVVEVLTSEVAVPAEETPAGAIWLSNLDLAARRGYTPTVYFFRSNGEPGFFAAEVVKESLARALVAFY<br/> PLAGRLGVDATTGRVQIDCNGEGAVFVTARSGRYALDDLMSEFAPCREMRDLFVPPTPPPNPPCPLL<br/> FVQVTRLRCGSVVLGQAMHHSACDARGAAHFFETWASIARGDAAAAPVPPCFDHGLLAARPERAV<br/> TYDHPEYMPPEPVDAAAASEYASAIITMTKAQVAALRARC PGASTFRAVVALVWRCACRARS LPHD<br/> AETRLYSMIDMRARLDPPLP PGYFGNAVVRTSVSATAAEVSSPVGHVARRALAATSQGGDYARSLV<br/> DYLEGVDAMNLRSGISRAHLRAISWVGMSLYKADFGWGAPAFMGPALMYYS GFVYVMNAAGKD<br/> GD LALVLSLEPESMPEFRKVF AEELARLDVV</p>                                 |
| <p>&gt;BdHCT4</p> <p>MAKVEVLATELVVPAGETPGGSIWLSNLDLAARRGYTPTVYFYRPNKHGAVDPEEAFFAAGAVKCSL<br/> AKALVAFYPLAGRLGLDDAAGRLQIDCTGEGAVLVTARSDHYALDELMSEFVPCGEMRDLFVPATPA<br/> PNPPCALLLAQVTRLRCGGVVLGLALHHSVVDARSAAHFVETWASISRGNHQDAPLVPPCFDHRL<br/> DARPYPARAVLYDHPEYKPEPAPVDVTPVSASTYASAIITVSKKQVAALRARCAGASTFRAVVALVWQ<br/> CACRARALAPGAETRLYSMIDMRPRLAPLPQGYFGNAVVRTSAVVTVDEVVSSPVAYGARRARAA<br/> TSQGGDYARSLVDYLETVDTMNLRSGISRAHLRAISWMGMSLS DADFGWGAPAFMGPALMYYS<br/> FVYVMNAPGKDG AVALALSLEPDSMPEFKKTF ADELARLEVEV</p>                         |
| <p>&gt;ZmHCT4</p> <p>MAMVELLSTELVVP AEETPAGAVWLSNLDLAARRGYTPTVYFYRTNGKPEFFETDAVKDSLARALVSF<br/> YPLAGRLGLDAATGRVQIDCTGEGAVFVTARWEQYALDEL VGEFVPCDEM RALLVPATPAPNPCCPL<br/> LFAQVTRLRCGGVVLGLALHHSVVDARSAAHFVETWAS IARGGAGAGAGTLP PCCFDHRLLNARPP<br/> GARAVAYDHPEYKAEAPAAADGGAGGGAAAGYASAIVTL SKAQVAALKARCAGASTFRAVVALVW<br/> QCACRARALPGDAETRLFSMVDMRARLAPLP PGYFGNAVVRTSALATAGEVTGNPVGYAARRALA<br/> ATSPGDDYARSLVDYLEGVDAMNLRSGISRAHLRAISWMGMSLHDSDFGWGAPVFMGPALMYYS<br/> GFVYVMQAPGKEGAVALALSLEPESMPEFRKVFAQELARLQAI</p>                     |
| <p>&gt;SbHCT4</p> <p>MAVEVVTSELVAPSETTPRRALWLSNLDLAARNGYTPTVYFFRRRC PQPQD GSGGDDDDRAPQQPS<br/> PDFFSADVLRAALAAALVQFY PFAGRLRAGRDDDGRAEIDCNAAGALFVVARSA AALED FDFGFAPSK<br/> AMNDTFVPKYDSTAGPDAP LLLLQVTFFRCCGGVTLGTAMHPFVIDGRSAFH FIRTWASIARGDTAAA<br/> AVPPSLDRTP LRARPLPTV LFDHTYEYGGRTSRPPTTGGNNKAAEYASAILRVTGAQAAALRARAGAV<br/> STFRALVAHVWRCACAARALAPDAESRLYTMVDMRARLSP LPDAFFGNAVARTSV SAVVGDLLAN<br/> PLGFGARRLRAATGHGDEYARSLDYLETADLAALPRGGLAGTDLRVISWLGMP SYDADFGWGEPAL<br/> LAPALMYYPGFVYLLNCPGNGKGGGVAVAVALEPERMERFKELFFEELAALE</p> |
| <p>&gt;AtHCT</p> <p>MKINIRDSTMVRPATETPITNLWNSNVDLVIPRFHTPSVYFYRPTGASNFFDPQVMKEALSKALVPFYP<br/> MAGRLKRDDDGRIEIDCNGAGVLFVVADTPSVIDDFGDFAPT LNLRLQLIPEVDHSAGIHSFLLVLQV<br/> TFFKCGGASLGVMQHHAADGFSGLHFINTWSDMARGLDLTIPP FIDRTLRRARDPPQPAFH HVEY<br/> QPAPSMKIPLDPSKSGPENTTVSIFKLTRDQLVALKAKSKEDGNTVSYSSEMLAGHVWRSVGKARGL<br/> PNDQETKLYIATDGRSRLRPQLPPGYFGNVIFTATPLAVAGDLLSKPTWYAAGQIHDFLVRMDDNYL<br/> RSALDYLEMQPDL SALVRGAHTYKCPNLGITSWVRLPIYDADFGWGRPIFMGPGGIPYEGLSFVLPSP<br/> TNDGSLSVAIALQSEHMKLF EKFLFEI</p>                               |

|                                                                                                                                                                                                                                                                                                                                                                                                                                                                                                                         |
|-------------------------------------------------------------------------------------------------------------------------------------------------------------------------------------------------------------------------------------------------------------------------------------------------------------------------------------------------------------------------------------------------------------------------------------------------------------------------------------------------------------------------|
| <p>&gt;PgHCT</p> <p>MIIAVKESTMVRPASETPSYALWNSNVDLVVPSMHTPSVYFYRPTGASDFFDPTVLKSALSRALVPFYP<br/>MAGRLKRDEDGRIEIDCNGEGVLFVVAETTSKVDDFGDFAPTLELRKLIPAVDYSAGITSYPVLVLQVTY<br/>FKCGGASLGVMQHHVADGFSGLHFVNSWSDIARGLDVSVPFIDRTLRLRARDPPQPQFEHIEYQPP<br/>PALKAPPSQAAHKPGTEPTTVSIFRMTKEQLGTLKGKSQDGNTVQYSSYEMLAGHVWRCACKARGL<br/>PDDQETKLYIATDGRARLHPPLPPGYFGNVIFTATPLAVAGDLQSKPTWYAASRIHDALVRMDNDYL<br/>RSALDYLELQPDLSALVRGAHTFRCPNLGITSWVRLPIHDADFGWGRPIFMGPGGIAYEGLAFVLPS<br/>DNDRSLSVAISLQTEHMKVFEKLLYEI</p>                  |
| <p>&gt;OsHCT1</p> <p>MAITVRRSTMVRPAWETPRVRLWNSNLDLVVPRFHTPSVYFYRRGPEGGAPEGFFDGERMRRALA<br/>EALVPFYPMAGRLARDEDGRVEIDCNGEGVLFVEADAPDASVDDYGFAPTMELELRKLIPAVDYTDI<br/>SSFSLLVLQVTYFKCGGVSLGVGMQHHVADGMSGLHFINSWSDLCRGTQIAIMPFIDRTLRLRARDPP<br/>TPSYPHVEYQPAPAMLSSVPQSVTANKTTPPTAVDIFKLTRSDLGRLRSQLPSEGAPRFSTYAVLAA<br/>HVWRCVSLARGLPSEQPTKLYCATDGRQRLQPPLPEGYFGNVIFTATPLAEAGKVTSGLADGAAVIQE<br/>ALDRMNDSYCRSALDYLELQPDLSALVRGAHTFRCPNLGLTSWVRLPIHDADFGWGRPVFMGPGGI<br/>AYEGLAFVLPSANKDGSLSLIAISLQAEHMEKFRKLIFEV</p>        |
| <p>&gt;OsHCT2</p> <p>MKINVRGSTMVRPAEETPRVRLWNSSLDLVVPRFHTPSVYFFRRGEAAAAEGGSYFDGERMRRALAE<br/>ALVPFYPMAGRLAHDEDGRVEIDCNGEGVLFVEADAPGATVDDFGDFAPTMDLKRLIPTVDYTDGIS<br/>SFPILVLQVTHFKCGGVALGVGMQHHVADGFSGLHFINSWADLCRGVPIAVMPFIDRTLVRARDPPA<br/>PSHPHVEYQPAPAMLAPEPPQALTAKPAPPPTAVDIFKLRSDDLGRRLRSQLPREGAPRYSTYAVLAA<br/>HVWRCASLARGLPAEQPTKLYCATDGRQRLQPSLPDGYFGNVIFTATPLAEAGRVTSGLADGAATIQ<br/>SALDRMDSGYCRSALDYLELQPDLSALVRGAHTFRCPNLGLTSWVRLPIHDADFGWGRPVFMGPGG<br/>IAYEGLAFVLPSASGDGSLSLIAISLQAEHMEKFRKMIFDF</p>      |
| <p>&gt;PrHCT2</p> <p>MAKIKVKEMTIKPAAKTHRRTVWLSGLDLMNSDVHTPFVYFYKPNGASDFFNPAVLKEALIKVLVSF<br/>YPMAGRFSLDSSRRLEIECNDEGALFVVAESSSVIDDGDFTPTPDMRKLVPADVSGGISSYPFLVLQ<br/>VTYFKCGGVSLGVGVEHRVVDGPAAFHFVNEWSNIARGLKLAIPPVFDRTIFCSRNPQVVFNFHEY<br/>QLTPGTKTSQQSSTTSTNSQSGVTTPVSVFEITIEQLNILKAKAKEDSNIVNYSTYEILAGHFWKCASIA<br/>RAIPNSQETRLHFAANGRNLRMKPRPQPGYFGNAVFVATSAVVASDLQYKPLWYAASRIRETIVRM<br/>DDNYLRSALDYLELFPNTKRDGAHFYESPNFRVTSWMKMPIYEANFGWGQPLYVGPAAMKHEGKAL<br/>IIPANKDGSLLLLVLQHEQMEVFKKLFYEEYYNDVKQVRYSLRAKL</p> |
| <p>&gt;LhHCT3</p> <p>MVNLIESCVIKPAKHTPNGLMSLSEFDQVGAIHASIVYLYQSPIDFDSAIVTLKDSLSNLVLTIFYPLAG<br/>RLHDIGKGRFEVDCNAIGAQFLVAESESRIEDFGDFHPTPQLQTLVPQVDTKAPVHEQPLLLVQVTKL<br/>GCGGMCLGLAISQIMVDGSSGFHFTNEWARLARGEQLKNPPFLDRRVLQAKEPALLEPSFDHPEYGP<br/>PPVLMGHTDALEEIKKETTIVMLKLDKKDIEKLKNKANNGENNYPLCYSRYEVVAGHMWRCACKARR<br/>HASQQLTWLYFPM DVNRNRIEPLPQFYFGNAVYRAAATSTSGELISKPLSYASSKIREAKAKATDEYLR<br/>SSMMFLKNLPDVSQCRNFHSPICEAFYGNPNIDINNSWGRQPSDGLDFGWGEEIYGGAHAGSEGG<br/>SIIMRGSHEDGSFLIMLHLQVAHIEDFKKFFYGDI</p>       |

>LhHCT3

MVNLIESCVIKPAKHTPNGLMSLSEFDQVGAITHASIVYLYQSPIDFDSAIVTLKDSLSNVLVTFYPLAG  
RLHDIGKGRFEVDCNAIGAQFLVAESESRIEDFGDFHPTPQLQTLVPQVDTKAPVHEQPLLLVQVTKL  
GCGGMCLGLAISQIMVDGSSGFHFTNEWARLARGEQLKNPPFLDRRVLQAKEPALLEPSFDHPEYGP  
PPVLMGHTDALEEIKKETTIVMLKLDKKDIEKLNKANNGENNYPLCYSRYEVVAGHMWRCACKARR  
HASQQLTWLYFPMDVRNRIEPLPQFYFGNAVYRAAATSTSGELISKPLSYASSKIREAKAKATDEYLR  
SSMMFLKNLPDVSQCRNFHSPICEAFYGNPNIDINNSWGRQPSDGLDFGWGEEIYGGAHAGSEGK  
SIIMRGSHEDGSFLIMLHLQVAHIEDFKKFFYGDI

>CsHCT2

MSRVTRDVQTHWVRPCQPQGSSGDQVWPISDFDYIQPAINIPLVAIYALPSDANGPSVIKDLRVGLA  
ETLGQYRQFGGRLQINDETGQHNIKTNDNDVVELSVQYHDGPDDDYVPSYAALEKDAFPPMLDSK  
KLLPRINTERQNLTHGDFHEDDAPVTMFMVTFIRGGLVIGVGLHHLATDVSGLDGFLESWAANTK  
RLVAGLPLAPFDHSIMDRALLTHSGPAPDVKRWTELDQRLKTVKLLDTAPQPPPEFKMPATSEVLFH  
FPRSKINQLKANASRTEPNTWISSYDAIMALCWRCVSRARQSSVTGDTATTLMAFVNGRGRCLKPLS  
KHVYGNVATLSWSELTFDEVVAPGAFPRLAALVRAANVEVDNDVYRSVVEWVAGIPDKRRVAFNM  
NAFLGPDVVGSSWQGLSAHQTWDFGFGTSKAIRWPKPDLDFGVFYPSRNTGDPDEGVEMVVCLE  
DSAMQKLLKDPEWLNAYAVAKGPRSCFDLDVAGA

>NpHCT2

MATVKVVESELVFPGEETPNHRLWLSNLDIMHALKLPTPLLYVYYPNGDSDFFNVAALKGLSKALVP  
YYPLAGRLNKGPDGRLEIDCNSKGALFVVAHSETCIDFGDFLPSPEMRRLTSPISVDDPAVLLMVQV  
TFFKGGEVILGLAWNHHVVDGVSLSNFSMTSWCKMTQGITELGNPPIHRTILRARSRPKVTDFDHVGN  
QLPTQIHSAQSPTTCSIFKLTKSQLAFLRKNNKFSTFDVGAHVWRCVCIARGLRDQEARLNFPIDA  
RGHLRPPLPNSYFGNVVCRLLVVVATVDDIISNPIDFTAHKIRGEIKKVNDYVRSYIDHLEVSTKKKML  
TPAERNTESTMLPKDSSNSSPSCEPESIAQTQDNFLLTPSKMDFGVVSWLGFPGSGTDFGWGPKPI  
LRRANISHGCYAYAMDSLNDGEVLVPVLLETENMERFKKAFSEQLSMHSVERMEKPRSKY

>OsHCT3

MAVEIVKSSMVTAGEATPEHRIWLSNLDLLVARSHPTPTVYVYRRTGPDSDAAFFSPDVLKAALSKVLV  
PFYPLAGRLAQDSAGRPEISCTGEGVLFVTARSGATIDDLGDLAPSDDELRRMLVPAADVAAAASILAMF  
QVTFFRCGGVCLGAAIHHTAADGLAALDFVNTWAAIARDVAGDGEAAAAAVQRPWLDRTLLRARS  
PPAVRFDHAEYSRRRGGSKLPFDSAILPMSKNQLNALKGAGAGAGKRLSTFTAVVAHVWRCACKA  
RGLAVAGTEAATRLYMTADARTRLHPPLPRGYLGNAIFRASAVSKVSDIVAAGPLGAVAEKVSAATAR  
LDDGYVRSLLDHLEQTAASGGAAGLRKGEWVMPESDLWVISWQGLPLYDADFGWGRPAFMGR  
ACLQFSGLVYLVPRDDGDGRLDVVVAMPESLAKFKDVFEELKC

>OsHCT4

MATVDVLTSEVVVPAGETPAGAVWLSNLDLAARRGYTPTVFFYRHNGEPGFFAADAMRDSLARALV  
AFYPVAGRLGLDGDGRVQVDCTGEGVVFATARSGHYALDDLMGEFVPCDEMRLDFVPAAPAAASC  
CPRGGALLLVQVTYLRGGVVLGMALHHSIADGRSAAHFVETWASIARGAPAADAPVPPCFDHRLL  
AARPARAVLYDHPEYKPEPAPPARAATASTYASAIITLKQQVGALRAACAGASTFRAVVALVWQCA  
CRARALPPEAETRLHSMIDTRQLSPPLPPGYFGNAVIRTSTAATAGEVVSSPVGHAARRARAATSQG  
EDYARSVVDYLEGVDAMNLPKSGVSRADLRAISWLGMSLADADFGWGSPAFMGPAIMYYSGFVYV  
MNAPGKDGAVALLSLEPESMPEFRKVFADEVARLA

>NpHCT3

MVAIEVVKSELVFPSEETPKHRLWISNTDIMFATKLPTPMIYVYHPNGDPDFFNVEMLKAGLSKALVPF  
YPLAGRLAKDRDGRLEVDCGRQGVLVVVARSDSGIDDFGEFLPSPELCRMLTPSIPSEDPDILFMTQVT  
FFKGGEVILGTWVCHVIGDGLSAMNFISTWSRITRGVVSNLDIHPLHDRTLLRARSPPKVLFNHVGNQ  
LPACAATTTGPSATSILPLTKSQLALLTTNNKISTFCAISAHVWKCYSIARGLARDQAVQLKFVNVNRR  
RMKPPLPDDYFGNAVCRMVVVSTADDVLSNPIEVVGNKIRDEIRKVDEEYVRSFIDHFEMSPTKGAKP  
PASSAKFSLTPTMADFAMASWIGMPIYDADFGWGKPEIVRIAAITDGQYAYIMEIPKGGGVLLVLSLEE  
ENMERFKEGFYEGLNMHGTIRTD

**Supplementary Table S2.** Primers used in the study.

| Primer name    | Primer sequence (5'–3')                  |
|----------------|------------------------------------------|
| ZjHCT-qPCR-F   | GAGATGCGGGACCTGTTCGT                     |
| ZjHCT-qPCR-R   | TACAGCACCGTTGGCGTGG                      |
| ZjHCT-F        | ATGGCTTCAAGGACGACAGTTA                   |
| ZjHCT-R        | GAGAAGGAAAGCAAGCCAGAA                    |
| 35SYFP-ZjHCT-F | GGGGACTCTTGACCATGGTAATGGCGACGGTGGAGGTGTT |
| 335YFP-ZjHCT-R | ACACGCGTACTAGTCAGATCGCCACCTCCAGGCTCGCCA  |
| UBI-ZjHCT-F    | GTGTTACTTCTGCAGAGGATGGCGACGGTGGAGGTGTT   |
| UBI-ZjHCT-R    | TAATCCAGATCTACCATAGGCTACGCCACCTCCAGGCTC  |
| ZjACT-F        | GGTCCTCTTCCAGCCATCCTTC                   |
| ZjACT-R        | GTGCAAGGGCAGTGATCTCCTTG                  |
| AsACT-F        | GAGGTCCTTCTGATATCCA                      |
| AsACT-R        | CCTTTTCCAGCCATCTTTCA                     |
| ASCSE-RT-F1    | CCACTCTGGCAGACCAAT                       |
| ASCSE-RT-R1    | TAGTCCATCCCGAACACG                       |
| ASCAD5-RT-F1   | TCAGGTATCGCTTCGTCATC                     |
| ASCAD5-RT-R1   | CATCCATCTCCAGCACAGTTT                    |
| ASCAD6-RT-F1   | TCATTCCCGCTTATCTTCG                      |
| ASCAD6-RT-R1   | AGCCTGGACCCATTCCCT                       |
| ASCAD8B-RT-F1  | AAGCAAACCAAGAAGGCAGAT                    |
| ASCAD8B-RT-R1  | TGTCAGGACCGAAAGGAGC                      |
| ASCCR2-RT-F1   | TTCTTCGGATCACATGGGTC                     |
| ASCCR2-RT-R1   | TCGGTAAACCGTGTTCTTTCT                    |
| ASCCR1C-RT-F1  | AAAGAAGAGCGGTAAAGGTG                     |
| ASCCR1C-RT-R1  | AAGCTAGTACGCAAGACTGGTA                   |
| ASPAL-RT-F1    | ACCAGGGAAAGCACATCG                       |
| ASPPAL-RT-R1   | TTGGCATCGGCATAGCAG                       |
| AS4CL5-RT-F1   | GGGTTATGGGATGACAGAGG\$                   |
| AS4CL5-RT-R1   | CCGGTCCACGATGAAGAT\$                     |
| AS4CLL7-RT-F1  | GGGATGTCATTTACCCTGCTA\$                  |
| AS4CLL7-RT-R1  | TGTTCTCCGTATGCCTTGC\$                    |

---

|                  |                        |
|------------------|------------------------|
| AS4CLL4-RT-F1    | CTTTGCTTAGTGGGTTGTTG\$ |
| AS4CLL4-RT-R1    | CTGCTGCTTATTGTGATGGT   |
| ASPOD1-RT-F1     | TCACCGAATCTCAAATACCA   |
| ASPOD1-RT-R1     | CAAGTGCTCGTCATGTCTCA   |
| ASCOMT-RT-F1     | GGTTTCCCGTTGAAGCAC     |
| ASCOMT-RT-R1     | GCACGAGCACCTTTGACT     |
| ASCCOAOMT1-RT-F1 | CAAGAACGGGAAGAGCAG     |
| ASCCOAOMT1-RT-R1 | CAGGGAAGTGACAGCAAA     |
| ASCCOAOMT2-RT-F1 | CTCGTAGTATTCCCGGTTCA   |
| ASCCOAOMT2-RT-R1 | CTTCTCCGTCCTGCTCAA     |
| ASCSE-RT-F1      | CCACTCTGGCAGACCAAT     |
| ASCSE-RT-R1      | TAGTCCATCCCGAACACG     |

---

,
